# Supplementary material
Source: PubMed Central journal article supplement (PMC7556149)
Supplement: advancesADV2020002604-suppl1.pdf [file advancesADV2020002604-suppl1.pdf]

## **Supplemental data**

### **Supplemental method**

#### **Study protocol**

##### *Fecal butyrate measurements*

Thirty milligrams of frozen stool samples were suspended in 600  $\mu\text{L}$  of 100% ethanol and homogenized by ultrasonication. After centrifugation, 10  $\mu\text{L}$  of the supernatant was mixed with 10  $\mu\text{L}$  of 1 ppm 2-ethylbutyric acid (Sigma-Aldrich, MO, USA) as an internal standard, and labeled with 2-nitrophenylhydrazide using a Short- and Long-Chain Fatty Acid Labeling Kit (YMC Co., Ltd. Kyoto, Japan). Liquid chromatography-tandem mass spectrometry (LC-MS/MS) analysis was conducted using a high-performance liquid chromatography system coupled to a triple-quadrupole mass spectrometer (LC-MS-8040, Shimadzu Co. Kyoto, Japan). Chromatographic separation was performed at a flow rate of 350  $\mu\text{L}/\text{min}$  and at 40  $^{\circ}\text{C}$ , using a 150 $\times$ 2.1-mm Mastro C18 3  $\mu\text{m}$  (Shimadzu GLC Ltd. Kyoto, Japan) with a mobile phase A (0.1% formic acid in water) and mobile phase B (acetonitrile). The separation gradient was as follows: 16% B at 0 min; 16 to 25% B in 6 min; 25 to 40% B in 3 min; and 40 to 95% B in 8 min. MS analyses were performed using electrospray ionization in the positive ion mode. The ions were detected using multiple reaction monitoring with mass transitions of  $m/z$  196.05 $\rightarrow$ 43.1 for acetic acid; 210.1 $\rightarrow$ 57.15 for propionic acid; 224.1 $\rightarrow$ 71.305 for butyric and isobutyric acid; 238.1 $\rightarrow$ 85.05 for valeric and isovaleric acid; and 252.15 $\rightarrow$ 99.2 for 2-ethylbutyric acid. LC-MS/MS data were analyzed by using LabSolutions Insight software (Shimadzu Co.). Butyrate concentration was normalized to the wet fecal sample weight.

| Species                               | Prevalence % ( $\geq 1$ read) |         |            |         |
|---------------------------------------|-------------------------------|---------|------------|---------|
|                                       | Pre-HSCT                      |         | Day 28     |         |
|                                       | Prebiotics                    | Control | Prebiotics | Control |
| <i>Propionibacterium acidifaciens</i> | 0                             | 1.4     | 0          | 2.8     |
| <i>Odoribacter splanchnicus</i>       | 13.3                          | 22.2    | 6.7        | 2.8     |
| <i>Porphyromonas asaccharolytica</i>  | 0                             | 0       | 0          | 0       |
| <i>Porphyromonas endodontalis</i>     | 0                             | 0       | 0          | 0       |
| <i>Porphyromonas gingivalis</i>       | 0                             | 0       | 0          | 0       |
| <i>Porphyromonas uenonis</i>          | 0                             | 0       | 0          | 0       |
| <i>Alistipes putredinis</i>           | 6.7                           | 22.2    | 3.3        | 11.1    |
| <i>Clostridium botulinum</i>          | 0                             | 0       | 0          | 0       |
| <i>Clostridium butyricum</i>          | 0                             | 0       | 0          | 0       |
| <i>Clostridium perfringens</i>        | 0                             | 4.2     | 6.7        | 0       |
| <i>Clostridium sporogenes</i>         | 0                             | 0       | 0          | 0       |
| <i>Anaerofustis stercorihominis</i>   | 0                             | 0       | 0          | 0       |
| <i>Eubacterium cellulosolvens</i>     | 0                             | 0       | 0          | 0       |
| <i>Eubacterium desmolans</i>          | 0                             | 0       | 0          | 0       |
| <i>Eubacterium hallii</i>             | 0                             | 5.6     | 3.3        | 2.8     |
| <i>Eubacterium limosum</i>            | 10                            | 12.5    | 0          | 0       |
| <i>Eubacterium rectale</i>            | 16.7                          | 6.9     | 3.3        | 0       |
| <i>Eubacterium saphenum</i>           | 0                             | 0       | 0          | 0       |

|                                       |      |      |      |     |
|---------------------------------------|------|------|------|-----|
| <i>Eubacterium ventriosum</i>         | 0    | 8.3  | 3.3  | 1.4 |
| <i>Pseudoramibacter alactolyticus</i> | 0    | 0    | 0    | 0   |
| <i>Anaerostipes caccae</i>            | 0    | 0    | 0    | 0   |
| <i>Butyrivibrio crossotus</i>         | 0    | 0    | 0    | 0   |
| <i>Butyrivibrio fibrisolvens</i>      | 0    | 0    | 0    | 0   |
| <i>Butyrivibrio proteoclasticus</i>   | 0    | 0    | 0    | 0   |
| <i>Clostridium saccharolyticum</i>    | 0    | 0    | 0    | 0   |
| <i>Clostridium symbiosum</i> *        | 26.7 | 48.6 | 13.3 | 5.6 |
| <i>Coprococcus catus</i>              | 0    | 9.7  | 0    | 2.8 |
| <i>Coprococcus comes</i>              | 3.3  | 6.9  | 3.3  | 1.4 |
| <i>Coprococcus eutactus</i>           | 0    | 1.4  | 0    | 0   |
| <i>Lachnoanaerobaculum saburreum</i>  | 0    | 0    | 0    | 0   |
| <i>Roseburia hominis</i>              | 0    | 6.9  | 3.3  | 1.4 |
| <i>Roseburia intestinalis</i>         | 6.7  | 8.3  | 0    | 0   |
| <i>Roseburia inulinivorans</i>        | 0    | 6.9  | 0    | 0   |
| <i>Shuttleworthia satelles</i>        | 3.3  | 1.4  | 3.3  | 0   |
| <i>Anaerococcus hydrogenalis</i>      | 0    | 0    | 3.3  | 0   |
| <i>Anaerococcus lactolyticus</i>      | 0    | 0    | 0    | 0   |
| <i>Anaerococcus prevotii</i>          | 0    | 0    | 0    | 0   |
| <i>Anaerococcus tetradius</i>         | 0    | 0    | 0    | 0   |
| <i>Anaerococcus vaginalis</i>         | 0    | 0    | 0    | 0   |

|                                      |      |      |      |      |
|--------------------------------------|------|------|------|------|
| <i>Peptoniphilus duerdenii</i>       | 0    | 0    | 0    | 0    |
| <i>Peptoniphilus harei</i>           | 0    | 0    | 0    | 0    |
| <i>Peptoniphilus lacrimalis</i>      | 0    | 0    | 0    | 0    |
| <i>Eubacterium yurii</i>             | 0    | 0    | 0    | 0    |
| <i>Peptoclostridium difficile*</i>   | 10   | 19.4 | 10   | 6.9  |
| <i>Anaerotruncus colihominis</i>     | 16.7 | 22.2 | 3.3  | 2.8  |
| <i>Faecalibacterium prausnitzii*</i> | 36.7 | 41.7 | 10   | 8.3  |
| <i>Subdoligranulum variabile</i>     | 3.3  | 4.2  | 0    | 0    |
| <i>Eubacterium dolichum</i>          | 0    | 0    | 0    | 0    |
| <i>Holdemanella biformis</i>         | 0    | 0    | 0    | 0    |
| <i>Acidaminococcus fermentans</i>    | 0    | 5.6  | 0    | 0    |
| <i>Acetonema longum</i>              | 0    | 0    | 0    | 0    |
| <i>Megasphaera micronuciformis</i>   | 6.7  | 4.2  | 23.3 | 0    |
| <i>Fusobacterium gonidiaformans</i>  | 0    | 0    | 0    | 0    |
| <i>Fusobacterium mortiferum</i>      | 20   | 9.7  | 3.3  | 5.6  |
| <i>Fusobacterium nucleatum*</i>      | 0    | 1.4  | 0    | 0    |
| <i>Fusobacterium ulcerans*</i>       | 13.3 | 20.8 | 20   | 9.7  |
| <i>Fusobacterium varium</i>          | 0    | 0    | 0    | 0    |
| <i>Brachyspira murdochii</i>         | 0    | 0    | 0    | 0    |
| <i>Brachyspira pilosicoli</i>        | 0    | 0    | 0    | 0    |
| <i>Treponema phagedenis</i>          | 0    | 0    | 0    | 0    |
| <i>Treponema vincentii</i>           | 0    | 0    | 0    | 0    |
| Total                                | 76.7 | 83.3 | 56.7 | 29.2 |

**Supplemental table 1. Butyrate-producing bacteria selected for analysis in the current study.**

\*: The following pairs of species were assigned the same bit score by glsearch:

Fusobacterium ulcerans/Fusobacterium sp. 12\_1B Fusobacterium nucleatum/Fusobacterium sp. 3\_1\_36A2

Clostridium symbiosum/Clostridium sp. 7\_3\_54FAA

Faecalibacterium prausnitzii/Faecalibacterium sp. DJF\_VR20

Peptoclostridium difficile/[Clostridium] difficile

|                           | Prebiotics group<br>(n=30) | Historical<br>control group<br>(n=72) | P value |
|---------------------------|----------------------------|---------------------------------------|---------|
| Sex                       |                            |                                       | 0.14    |
| Male                      | 17                         | 44                                    |         |
| Female                    | 13                         | 28                                    |         |
| Age                       |                            |                                       | 0.171   |
| <55                       | 23                         | 44                                    |         |
| ≥55                       | 7                          | 28                                    |         |
| Primary disease           |                            |                                       | 0.826   |
| AML                       | 13                         | 32                                    |         |
| ALL                       | 7                          | 12                                    |         |
| MDS                       | 4                          | 14                                    |         |
| Others                    | 6                          | 14                                    |         |
| Disease risk*             |                            |                                       | 0.665   |
| Low risk                  | 19                         | 42                                    |         |
| High risk                 | 11                         | 30                                    |         |
| Number of transplantation |                            |                                       | 0.629   |
| 1                         | 28                         | 69                                    |         |
| ≥2                        | 2                          | 3                                     |         |
| Donor sex                 |                            |                                       | 0.36    |
| Male                      | 22                         | 45                                    |         |
| Female                    | 8                          | 27                                    |         |
| Sex match                 |                            |                                       | 0.14    |
| Female to male            | 2                          | 14                                    |         |
| Others                    | 28                         | 58                                    |         |
| HLA disparity (X6)        |                            |                                       | 0.528   |
| 0                         | 15                         | 17                                    |         |
| 1                         | 6                          | 18                                    |         |
| 2                         | 6                          | 7                                     |         |
| ≥3                        | 3                          | 10                                    |         |
| Allo-HSCT type            |                            |                                       | 0.708   |
| rPBSCT                    | 6                          | 10                                    |         |
| rBMT                      | 1                          | 2                                     |         |
| uPBSCT                    | 0                          | 1                                     |         |
| uBMT                      | 13                         | 42                                    |         |

|                                                                                         |                               |    |    |       |
|-----------------------------------------------------------------------------------------|-------------------------------|----|----|-------|
|                                                                                         | CBT                           | 4  | 7  |       |
|                                                                                         | Haplo (PT-CY)                 | 3  | 3  |       |
|                                                                                         | Haplo (low dose ATG+ steroid) | 3  | 7  |       |
| Conditioning                                                                            |                               |    |    | 0.179 |
|                                                                                         | MAC                           | 22 | 41 |       |
|                                                                                         | RIC                           | 8  | 31 |       |
| ATG                                                                                     |                               |    |    | 0.329 |
|                                                                                         | Yes                           | 5  | 7  |       |
|                                                                                         | No                            | 25 | 65 |       |
| TBI                                                                                     |                               |    |    | 0.415 |
|                                                                                         | Yes                           | 26 | 56 |       |
|                                                                                         | No                            | 4  | 16 |       |
| GVHD prophylaxis                                                                        |                               |    |    | 0.419 |
|                                                                                         | CsA based                     | 7  | 12 |       |
|                                                                                         | FK based                      | 23 | 60 |       |
| Use of antibiotics with relatively higher anaerobic activity (conditioning to day 28) † |                               |    |    | 1.0   |
|                                                                                         | Yes                           | 23 | 56 |       |
|                                                                                         | No                            | 7  | 16 |       |

**Supplemental table 2. Patient characteristic (feces contributor, only)**

Abbreviations: ALL, acute lymphoblastic leukemia; allo-HSCT, allogeneic hematopoietic stem cell transplantation; AML, acute myeloid leukemia; ATG, antithymocyte globulin; BMT, bone marrow transplantation; CBT, cord blood transplantation; CsA, cyclosporine; FK, tacrolimus; GVHD, graft-versus-host disease; Haplo, haploidentical transplantation; HLA, human leukocyte antigen; MAC, myeloablative conditioning; MDS, myelodysplastic syndrome; PBSCT, peripheral blood stem cell transplantation; PT-CY, post-transplant cyclophosphamide; r, related; RIC, reduced-intensity conditioning; TBI, total body irradiation; u, unrelated.

\*: Low disease risk included acute leukemia in first complete remission (CR), CML in first chronic phase, myelodysplastic syndromes in refractory anemia, malignant lymphoma in CR, nonmalignant hematologic diseases. All other diagnoses and 2nd allo-SCT were included in high disease risk.

†: Antibiotics with relatively high anti-anaerobe activity: meropenem, imipenem-cilastatin, and piperacillin-tazobactam. The other antibiotics were third- and fourth-generation cepheps, polypeptides, quinolones, sulfamethoxazole-trimethoprim, aminoglycosides, and aztreonam.

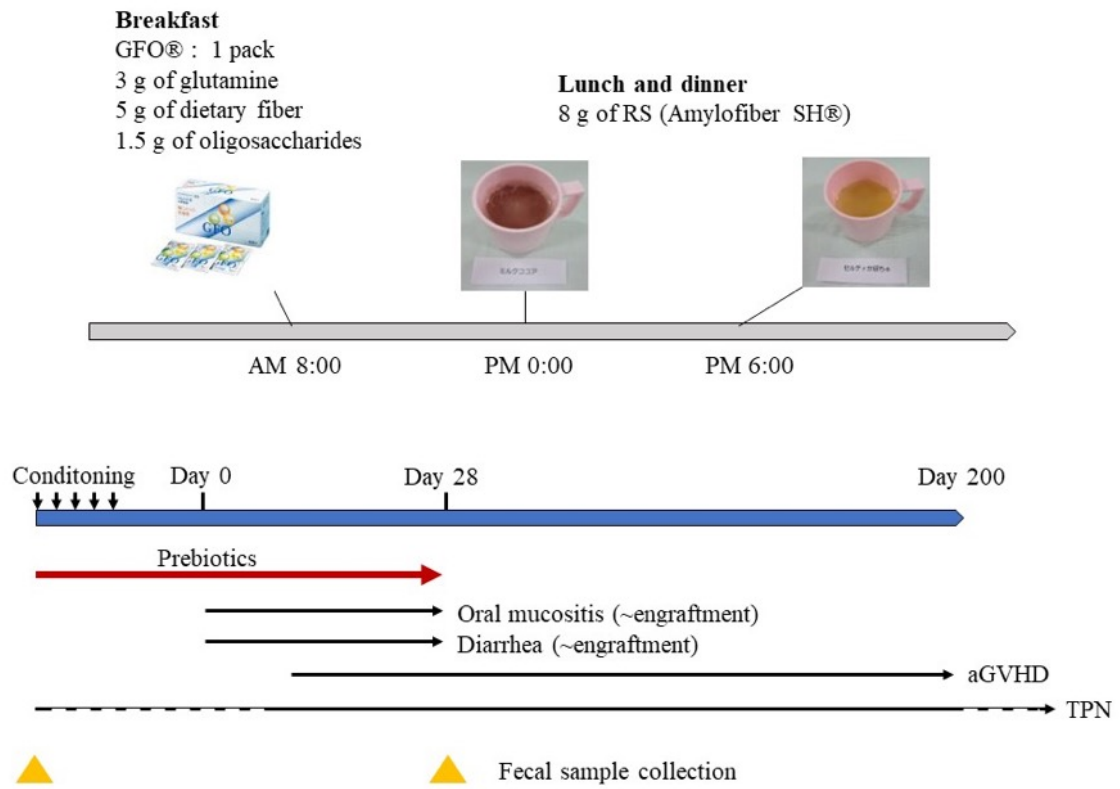

Supplemental figure 1. Study schema.



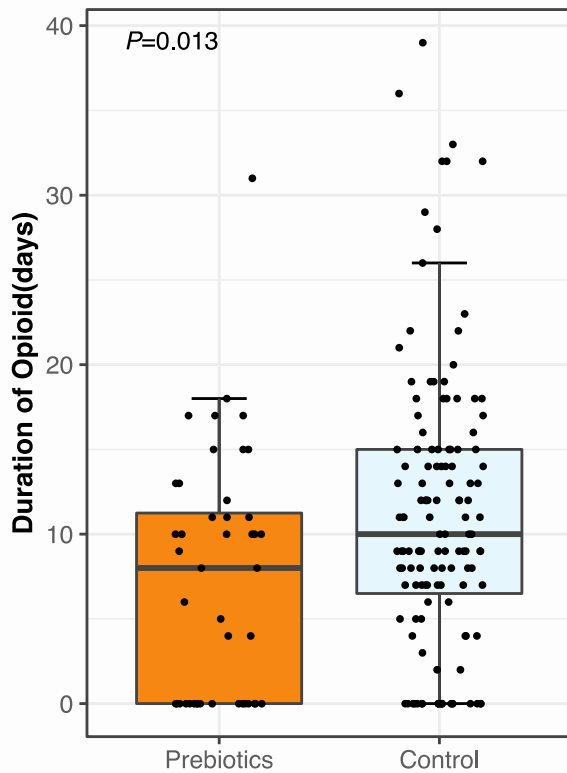

**Supplemental figure 2. Duration of opioid use.** Each dot represents each patient. The duration of opioid use until engraftment was significantly shorter in the prebiotics group (median 8 days in the prebiotics group vs. 10 days in the historical control group,  $P=0.013$ ). Furthermore, the proportion of patients who did not receive opioid therapy was also higher in the prebiotics group (34.1% in the prebiotics group vs. 14.5% in the historical control group).

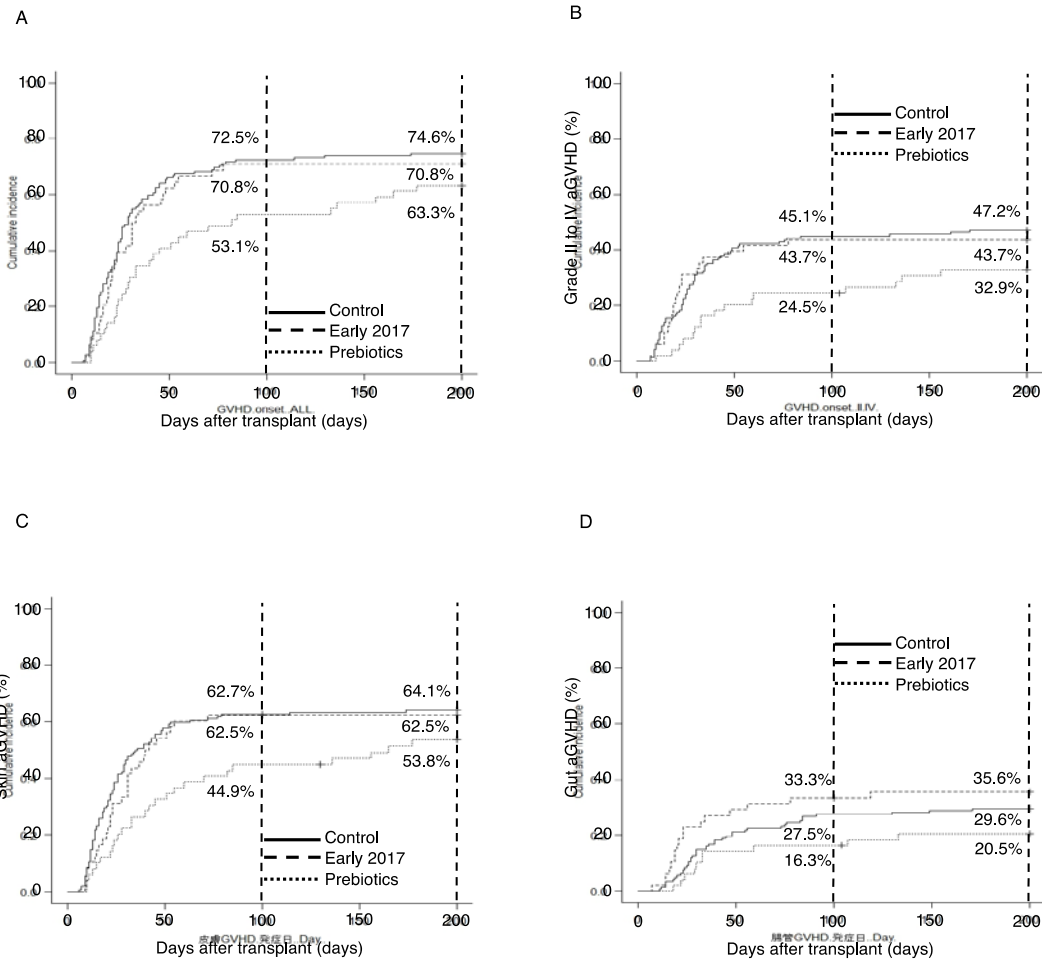

**Supplemental figure 3. The cumulative incidence of aGVHD in three different time periods.** The cumulative incidences of all grade (A), grade II – IV (B), skin all stage (C), and gut all stage (D) aGVHD were evaluated in patients who received allo-HSCT between 2013 and 2015 (Historical control group), at early 2017, and at late 2017 (Prebiotics group). The cumulative incidences of aGVHD in early 2017 showed similar results to those in the historical control group, not in the prebiotics group.

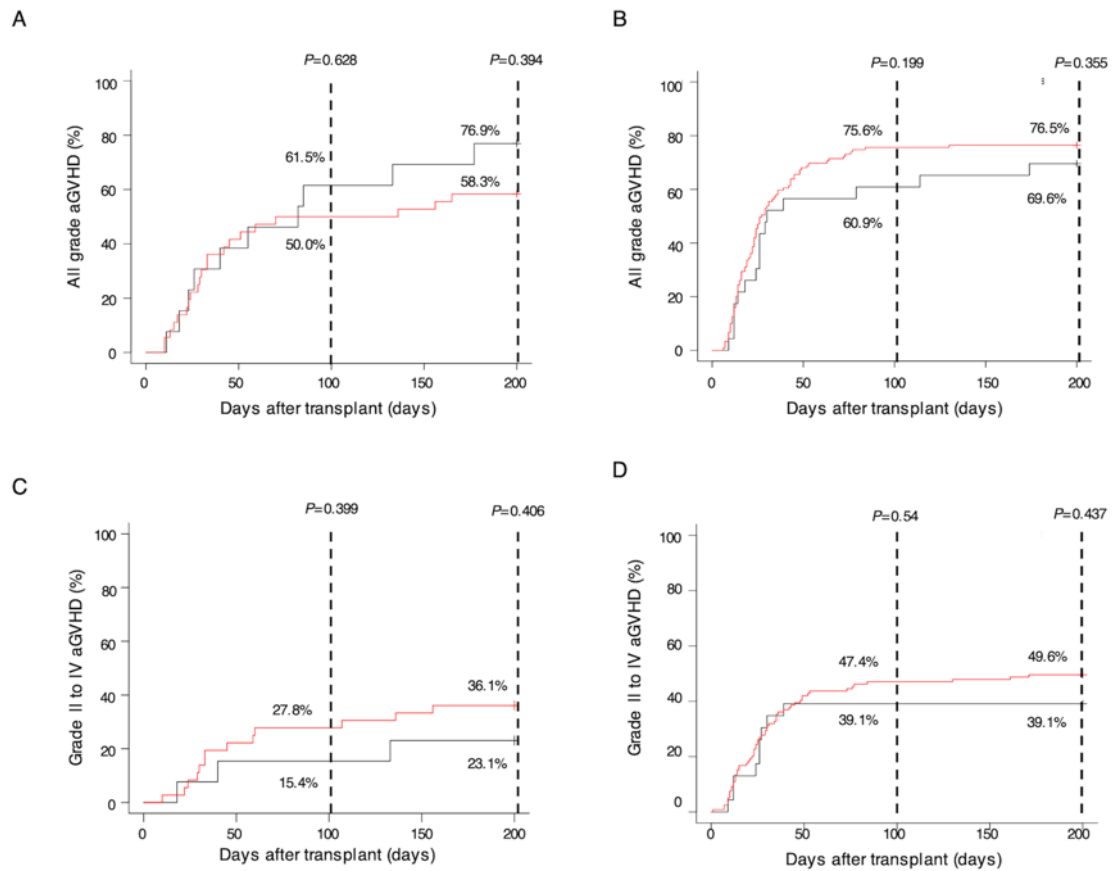

**Supplemental figure 4. The cumulative incidence of aGVHD according to the use of antibiotics with relatively high anti-anaerobe activity.** The cumulative incidences of all grade (A, C) and grade II – IV (B, D) aGVHD were evaluated between patients who did (red line) or did not (black line) received antibiotics with relatively high anti-anaerobe activity from conditioning to engraftment in the prebiotics group (A, B) and in the historical control group (C, D). The use of such antibiotics did not significantly increase the cumulative incidences of aGVHD.

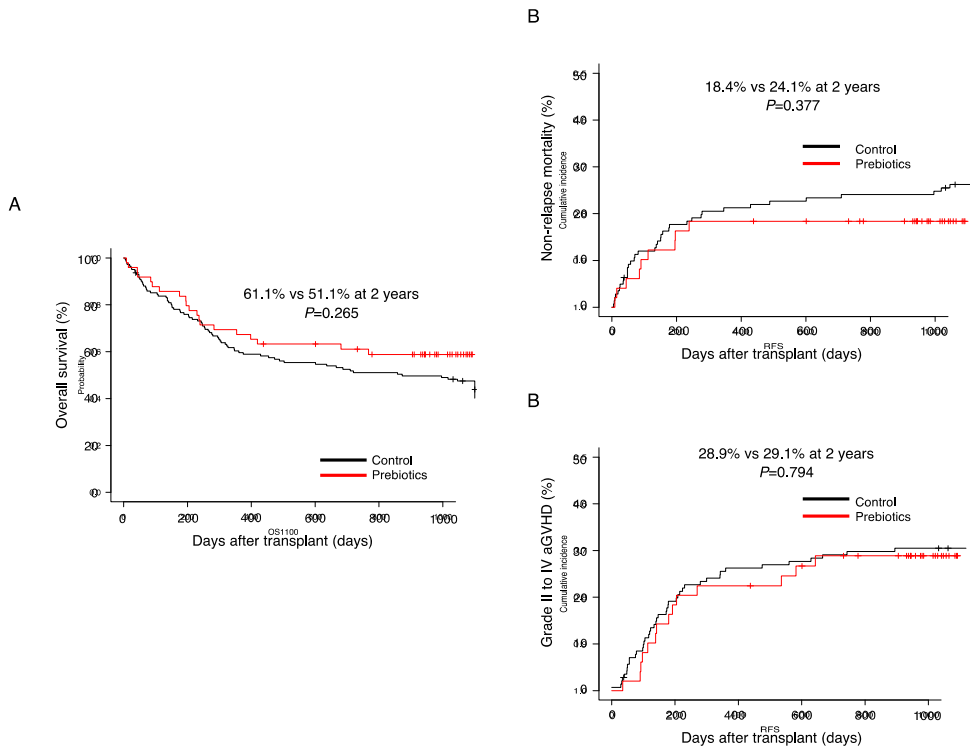

**Supplemental figure 5. Clinical outcomes in patients.** No significant differences in the overall survival (61.1% vs. 51.1% at 2 years,  $P=0.265$ ) (A), non-relapse mortality (18.4% vs. 24.1%,  $P=0.377$ ) (B), and the cumulative incidence of relapse (28.9% vs. 29.1%,  $P=0.794$ ) (C) were noted between the two groups.
